# Supplementary material for: Vaccination with Glycan-Modified HIV NFL Envelope Trimer-Liposomes Elicits Broadly Neutralizing Antibodies to Multiple Sites of Vulnerability
Source: PubMed Central journal article supplement (PMC6891888; doi:10.1016/j.immuni.2019.10.008), 2019-11-19
Supplement: mmc1.pdf [file mmc1.pdf]

**Supplemental Information**

**Vaccination with Glycan-Modified HIV NFL Envelope**

**Trimer-Liposomes Elicits Broadly Neutralizing**

**Antibodies to Multiple Sites of Vulnerability**

**Viktoriya Dubrovskaya, Karen Tran, Gabriel Ozorowski, Javier Guenaga, Richard Wilson, Shridhar Bale, Christopher A. Cottrell, Hannah L. Turner, Gemma Seabright, Sijy O'Dell, Jonathan L. Torres, Lifei Yang, Yu Feng, Daniel P. Leaman, Néstor Vázquez Bernat, Tyler Liban, Mark Louder, Krisha McKee, Robert T. Bailer, Arlette Movsesyan, Nicole A. Doria-Rose, Marie Pancera, Gunilla B. Karlsson Hedestam, Michael B. Zwick, Max Crispin, John R. Mascola, Andrew B. Ward, and Richard T. Wyatt**

# Figure S1

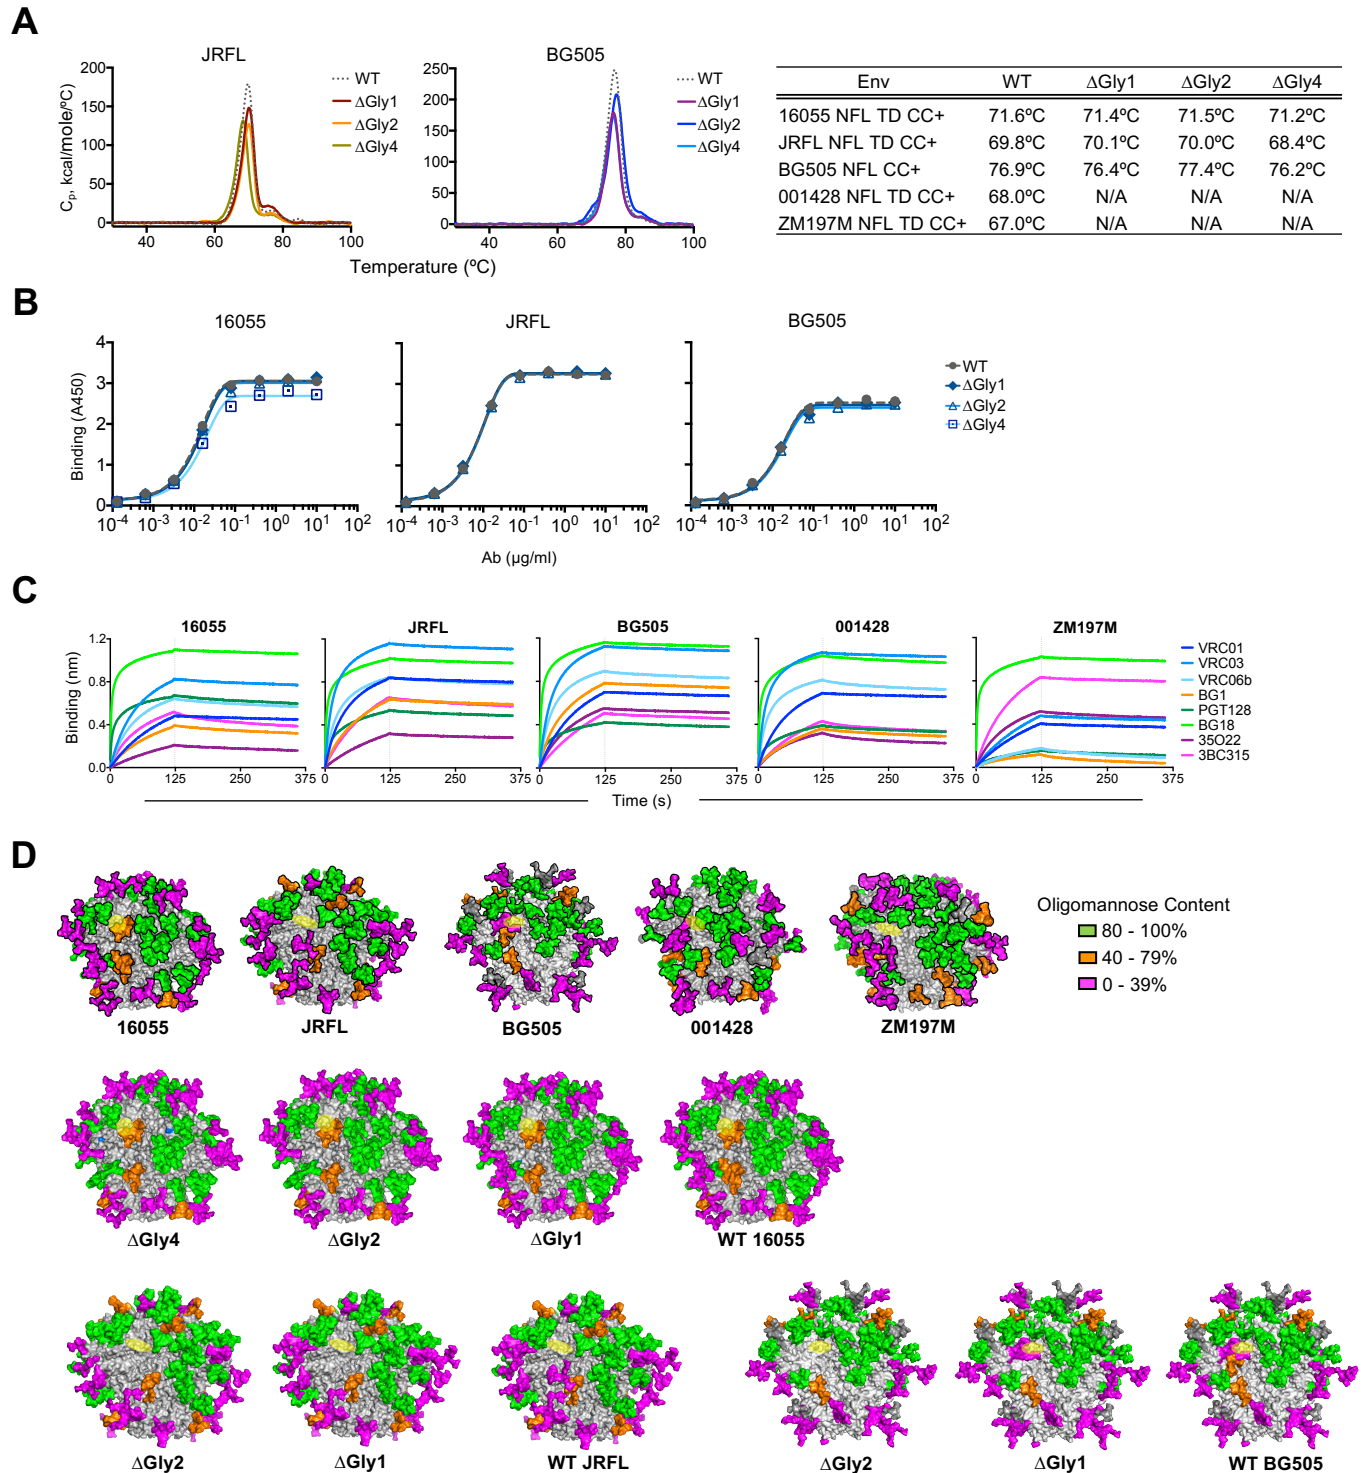

**Figure S1. Biophysical characterization of immunogens, related to Figure 1 and Table S1.** (A) Thermostability of glycan-deleted trimers compared to parental (WT), as determined by differential scanning calorimetry.  $T_m$  values are summarized in the table to the right. (B) Antigenicity of the glycan-deleted trimers compared to parental (WT), as determined by His-capture ELISA. (C) Relative binding affinity of the NFL trimers to a panel of CD4bs-directed mAbs, as determined by BLI. GE136, which is non-neutralizing and does not bind to well-folded trimers, was used as a negative control. (D) Site-specific glycan analysis of all immunogens. Glycans are colored by oligomannose content. CD4bs is marked in yellow for reference.

# Figure S2

## A

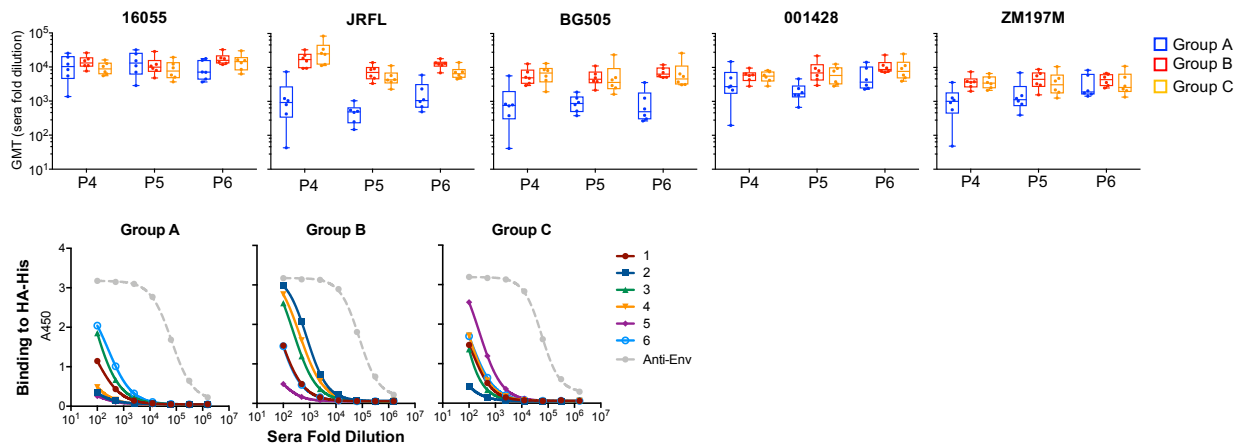

## B

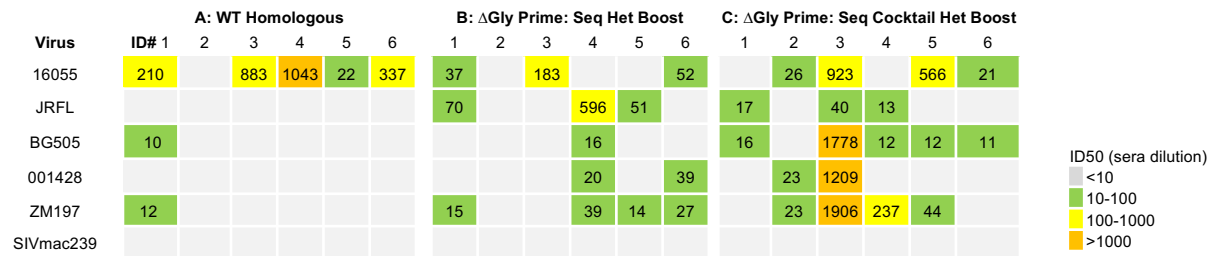

## C

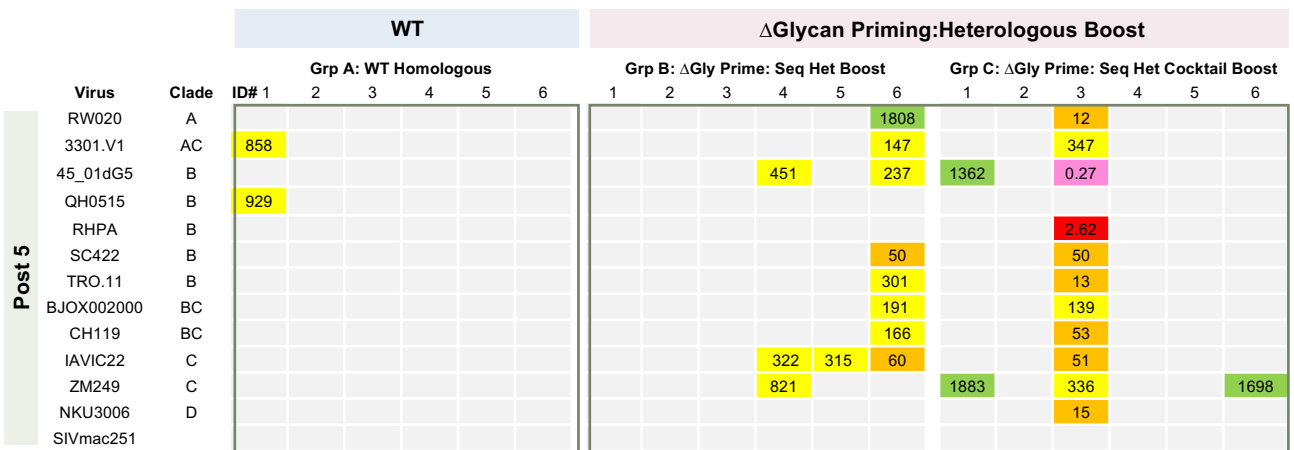

## D

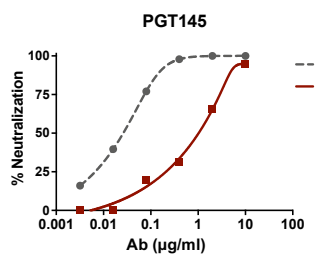

## E

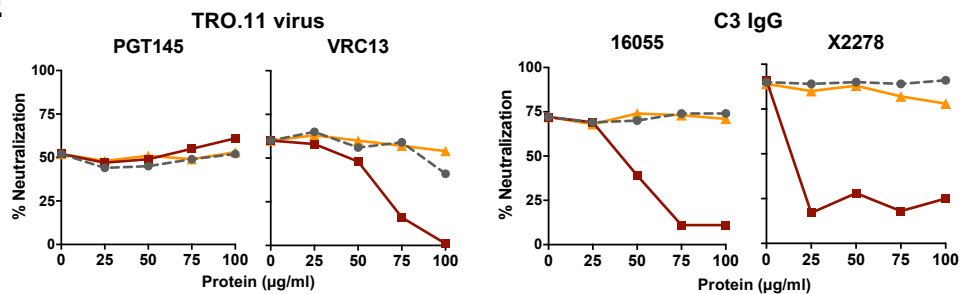

**Figure S2. Characterization of vaccine-elicited neutralizing responses reveals cross-neutralization in multiple subjects, related to Figure 2.** (A) Geometric mean IgG titers (GMT,  $\pm$ SD;  $n = 6$ ) are shown above for Post 4 to Post 6 immunizations, as measured by His-capture ELISA to the different WT immunogens. Below, anti-His binding responses directed against HA-His protein from Post 6 sera, as measured by ELISA with animal numbers from each group as indicated. The sera were also assessed against 16055 NFL trimer with the average response for each group shown as a gray dashed line for reference. (B) Post 6 sera neutralizing titers ( $ID_{50}$ , sera-fold dilution at which 50% neutralization is achieved) are indicated against the panel of viruses used to derive the sequential Env trimer immunogens. (C) Cross-neutralization of purified IgG ( $IC_{50}$ ,  $\mu$ g/ml) from the Post 5 time point against a panel of representative (tier 2) clinical HIV-1 isolates across different clades. (D) The trimer-specific PGT145 bNAb served as a positive control for the solid-phase adsorption assay using a 16055 NFL TD CC<sup>+</sup> trimer affinity column to deplete Env binding Abs prior to neutralization assessment against virus TRO.11. A PBS-immersed (media) blank lectin column was used as a negative control. (E) Differential adsorption of virus entry. Left, PGT145 or VRC13 (CD4bs-directed bNAb) were pre-incubated at a fixed concentration with culture medium (no inhibitor) or titrating amounts of WT or the CD4bs knockout (368/474) 16055 gp120 TriMut proteins prior to assessing neutralization against virus TRO.11 as negative and positive controls. Right, purified IgG from C3 anti-sera (Post 5) was pre-incubated at a fixed concentration with medium or titrating amounts of the TriMut proteins prior to assessing neutralization against viruses 16055 and X2278. All assays were performed at least twice with representative data shown.

# Figure S3

**A**

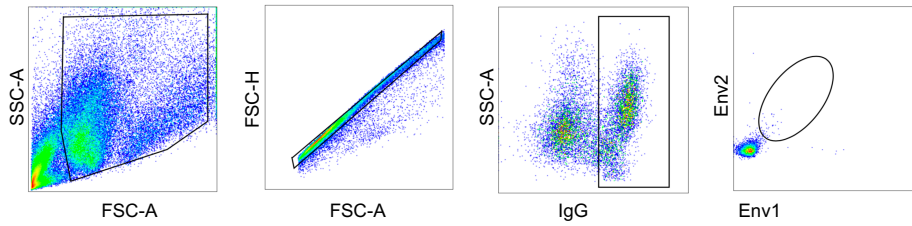

**B**

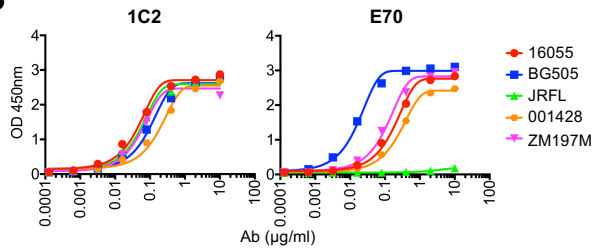

**C**

| mAb | Sorted From | Probes           | Chain | V-GENE          | J-GENE       | D-GENE     | CDR3-IMGT            | CDR3, aa | SHM, %* |
|-----|-------------|------------------|-------|-----------------|--------------|------------|----------------------|----------|---------|
| E70 | Splenocytes | 16055 gp120      | HC    | IGHV1S40*01 F   | IGHJA*01 F   | IGHD3-1*01 | RFAGYRYSVWSYPDL      | 15       | 8       |
|     |             | SC422 NFL TD CC+ | KC    | IGKV1S36*01 [F] | IGKJ1-2*01 F |            | QSAYNGDGDNA          | 11       | 8       |
| 1C2 | Lymph nodes | 16055 NFL TD CC+ | HC    | IGHV1S40*01 F   | IGHJ4*01 F   | IGHD8-1*01 | ARGAVTYDGLGGAYLKHFNL | 20       | 5       |
|     |             | 1086c NFL TD CC+ | KC    | IGKV1S47*01 [F] | IGKJ1-4*03   |            | LYGYISSDRID          | 11       | 6       |

**D**

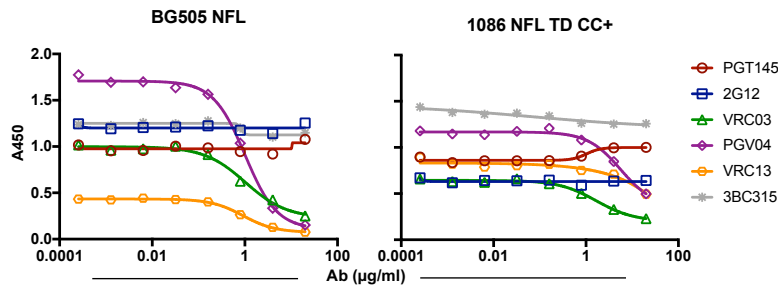

**E**

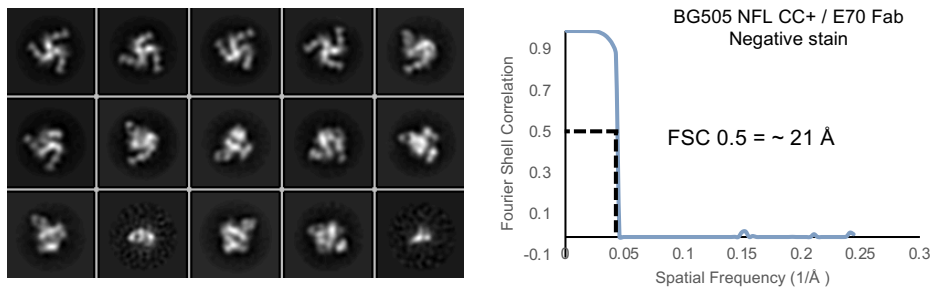

**F**

| N-Glycan Dependence |       |       |         | N234 Restoration |         |         |       |
|---------------------|-------|-------|---------|------------------|---------|---------|-------|
|                     | 16055 | BG505 | 1086.B2 | ZM249M           | JRFL    |         |       |
| WT                  | 0.96  | 0.05  | 0.03    | >50              | >50     |         |       |
| N234A               | >50   | >50   | >50     | 2.33             | >50     |         |       |
| N234Q               | >50   | >50   | ND      |                  |         |         |       |
| (T/S)236A           | >50   | >50   | ND      |                  |         |         |       |
| N276A               | 0.04  | 0.03  | ND      | N276 Deletion    |         |         |       |
| N360A               | 0.35  | ND    | ND      | 001428           | Iavic22 | 92TH021 |       |
| N463A               | 0.99  | ND    | ND      | >50              | >50     | 2.13    |       |
| 295N                | 1.95  | ND    | ND      | N276A            | 0.012   | 0.46    | 0.018 |
| 339N                | 2.31  | ND    | ND      |                  |         |         |       |
| 355N                | 0.74  | ND    | ND      |                  |         |         |       |

**Figure S3. Isolation and characterization of two mAbs from rabbit C3 that can cross-neutralize HIV clinical isolates, related to Figures 2-3 and Table S2-S4.** (A) FACS plots showing the gating strategy used for sorting single, dual Env<sup>+</sup> B cells from rabbit C3 samples collected two weeks after the sixth immunization. (B) Binding of isolated cross-neutralizing rabbit mAbs, 1C2 and E70, against the WT immunogens used in the study by His-capture ELISA. (C) Summary Table of E70 and 1C2 features based on currently available information in the IMGT database. \*, max SHM% calculated based on putative gene assignments. (D) Cross-competition ELISA of E70 against a panel of representative bNAbs targeting different Env epitopes: PGT145 (V2), 2G12 (N332 glycan supersite), CD4bs (VRC03, PGV04, VRC13), 3BC315 (gp120:gp41 interface). (E) EM 2D class averages of E70 Fab bound to BG505 NFL CC<sup>+</sup> trimer with the Fourier shell correlation graph shown. (F) Neutralization assessment of E70 against a panel of N-glycan mutants (deleted or restored) to determine N-glycan sensitivity. IC<sub>50</sub> (μg/ml) values shown.

**Figure S4**

**A**

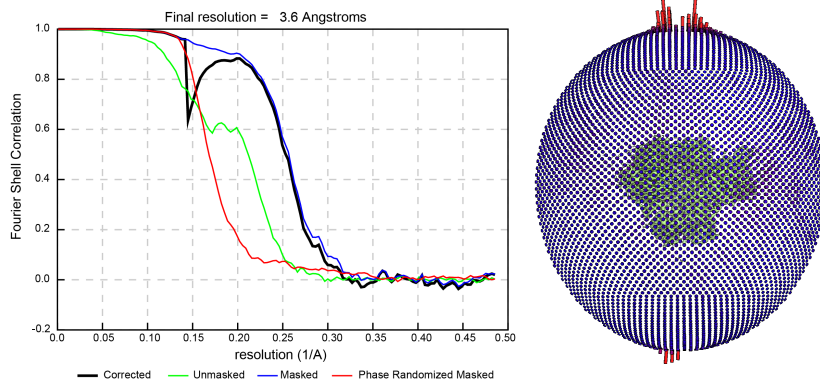

**B**

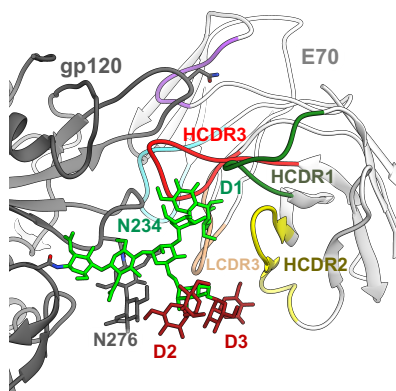

**C**

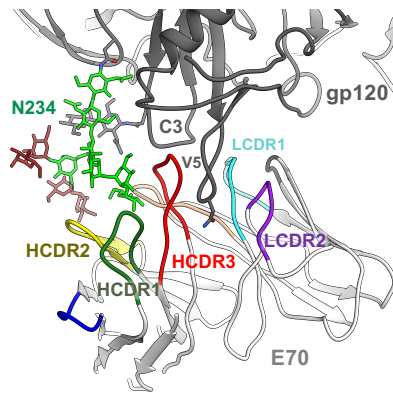

**D**

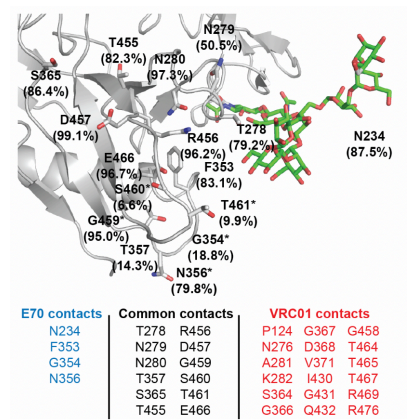

**E**

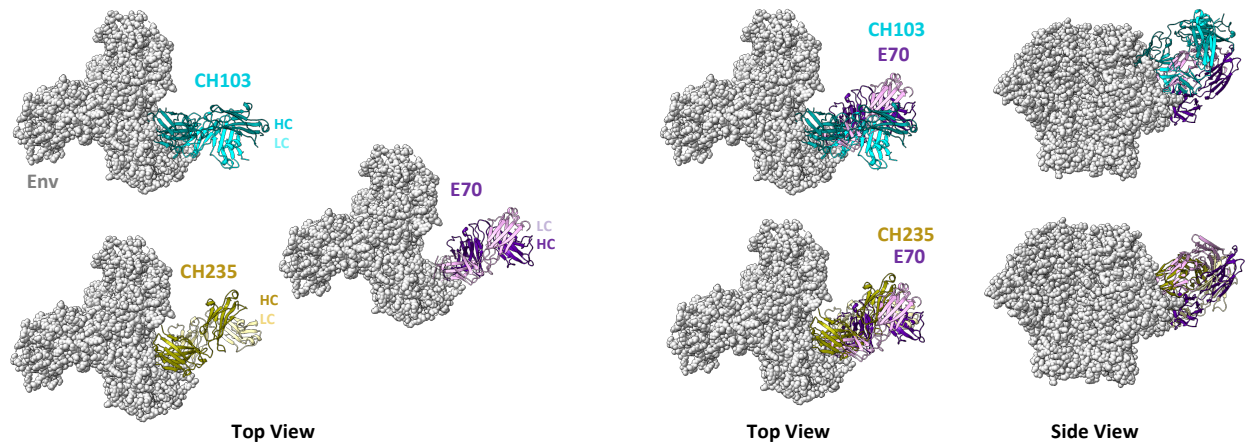

**F**

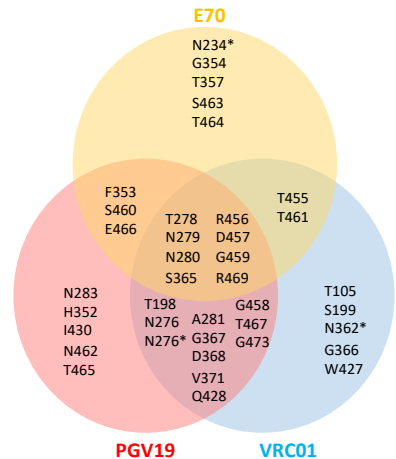

**G**

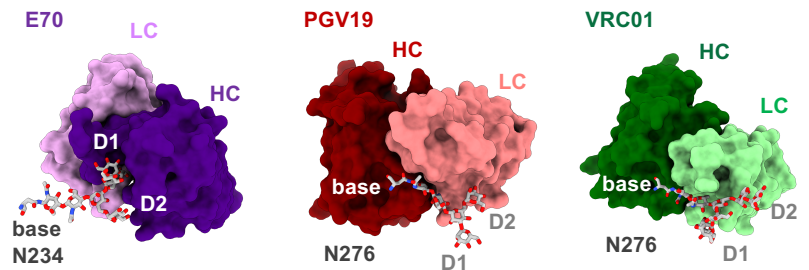

**Figure S4. Epitope analysis reveals the CD4bs-directed E70 recognizes a chimeric N-glycan polypeptide epitope, related to Figure 4 and Table S5.** (A) Fourier shell correlation (FSC) and orientation angle distribution of C3 symmetric reconstruction of BG505 NFL CC+ in complex with E70 Fab. (B) E70 Fab interactions with N234 glycan are primarily with the D1 arm. A complete Man9 glycoform is modeled (data supported sugars colored green; idealized model sugars colored dark red) to demonstrate that the D2 and D3 arms can be accommodated but do not contribute to the Ab epitope. Glycan N276 (grey) below is not involved in binding. (C) Additional E70 peptide contacts include C3 and V5 of gp120. (D) Amino acid contacts within the E70 epitope with conservation shown as a percentage. (E) Env binding angle comparison between E70 and non-VRC01 class Abs CH103 (PDB 4JAN) and CH235 (5F9W). (F) Overlap of contact residues between E70, VRC01, and PGV19. Asparagine residues marked with a star (\*) denote that the contact is with a sugar molecule and not the amino acid side chain. Analysis based on a 4.0 Å distance cutoff between Fab and gp120 (VRC01 based on PDB 5FYK; PGV19 based on PDB 6B0N). Residues listed are of BG505 NFL TD CC+ (HXBe2 numbering). (G) Differences in glycan interactions between CD4bs-directed mAbs. VRC01 based on PDB 5FYK. PGV19 based on PDB 6B0N.



## Figure S5

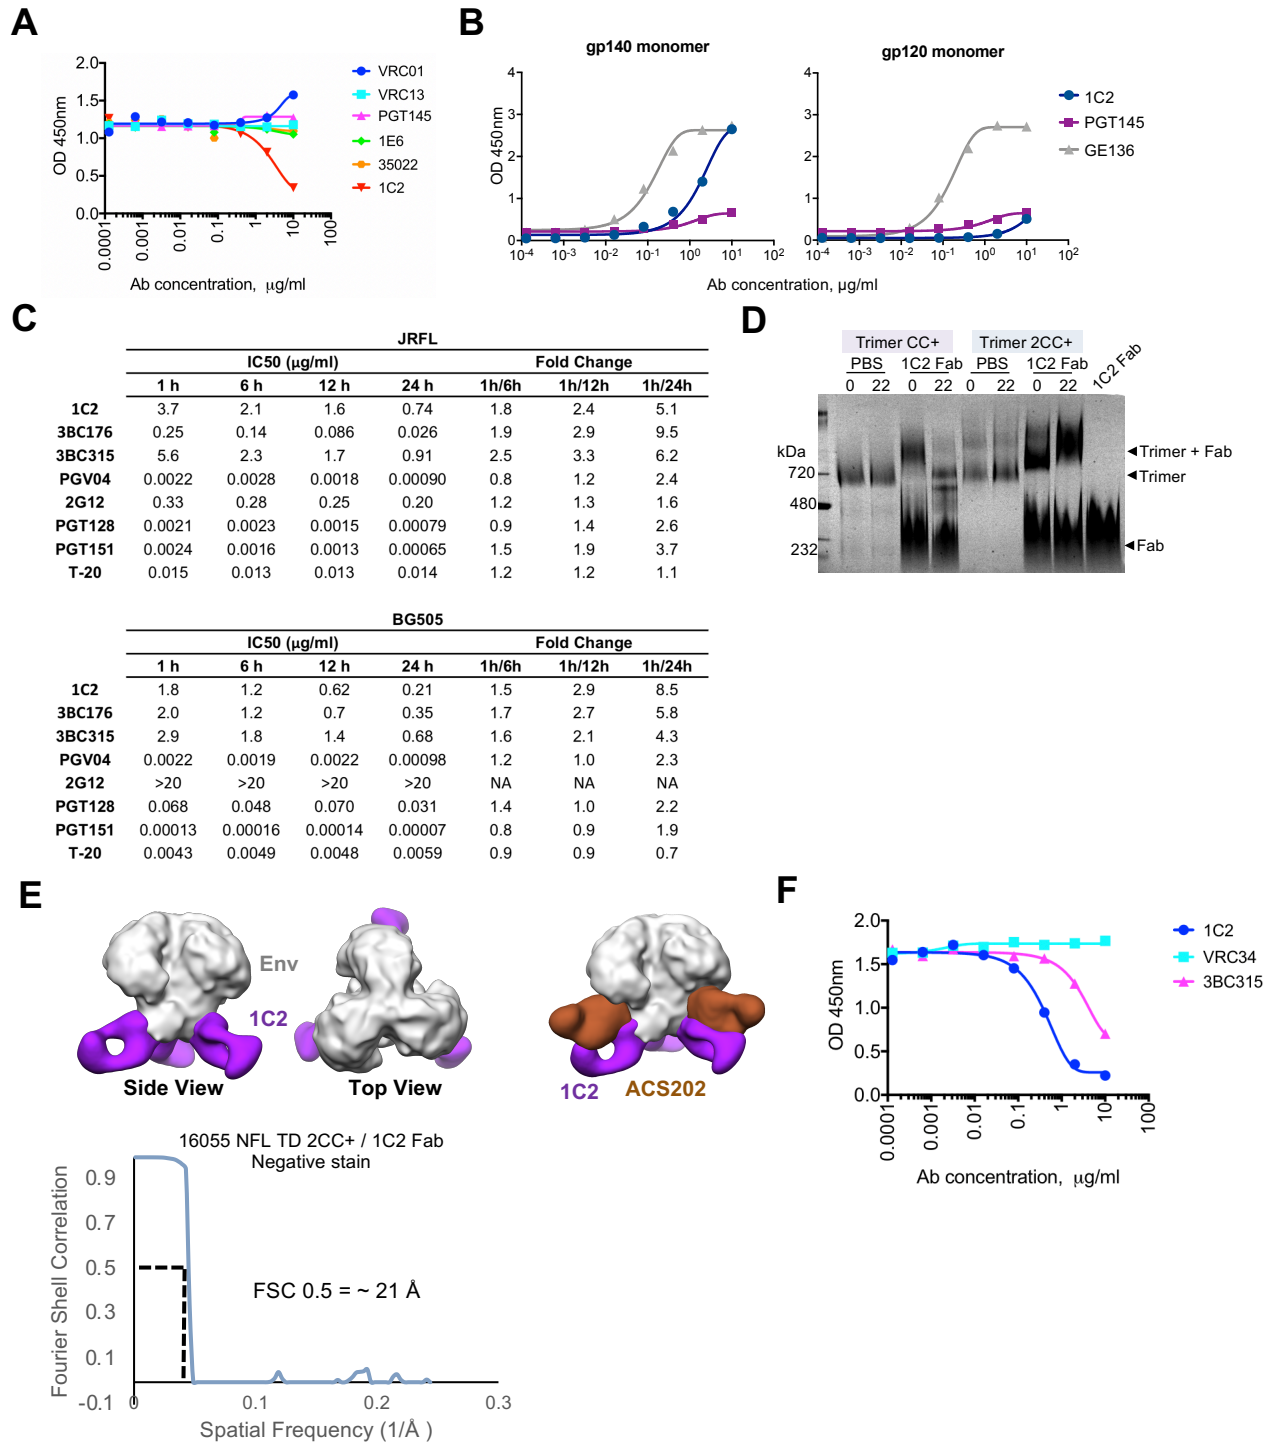

**Figure S5. 1C2 binds the gp120:gp41 interface and destabilizes the Env trimer, related to Figure 5.** (A) Cross-competition ELISA between rabbit mAb, 1C2, against a panel of human mAbs targeting different Env sites [CD4bs (VRC01, VRC13), V2-apex (PGT145), 35022 (gp120:gp41)]. (B) Binding of 1C2 to 16055 gp140 monomer (left) compared to gp120 monomer (right) by ELISA. PGT145 (trimer-specific) and GE136 (monomer-specific) were used as negative and positive controls. (C) Antibodies noted on the left were pre-incubated with JRFL or BG505 virus for various times as indicated and then added to TZM-bl cells to test for infectivity. IC<sub>50</sub> (µg/ml) values are noted with fold changes in IC<sub>50</sub> values over time calculated relative to the standard 1-hr incubation time. (D) 1C2 Fab was pre-incubated for the indicated times with soluble 16055 NFL TD CC+ or 2CC+ trimers prior to separation by blue-native PAGE. (E) Left, EM 3D reconstruction model of 1C2 Fab (purple) bound to 16055 NFL TD 2CC+ trimer with the Fourier shell correlation graph shown below. Right, another gp120:gp41-directed bAb, ACS202 (EMD-8299) is docked into the 1C2:16055 NFL TD 2CC+ model for comparison. (F) Cross-competition ELISA between 1C2 and VRC34 (FP-directed) and 3BC315 (gp120:gp41).

**Figure S6**

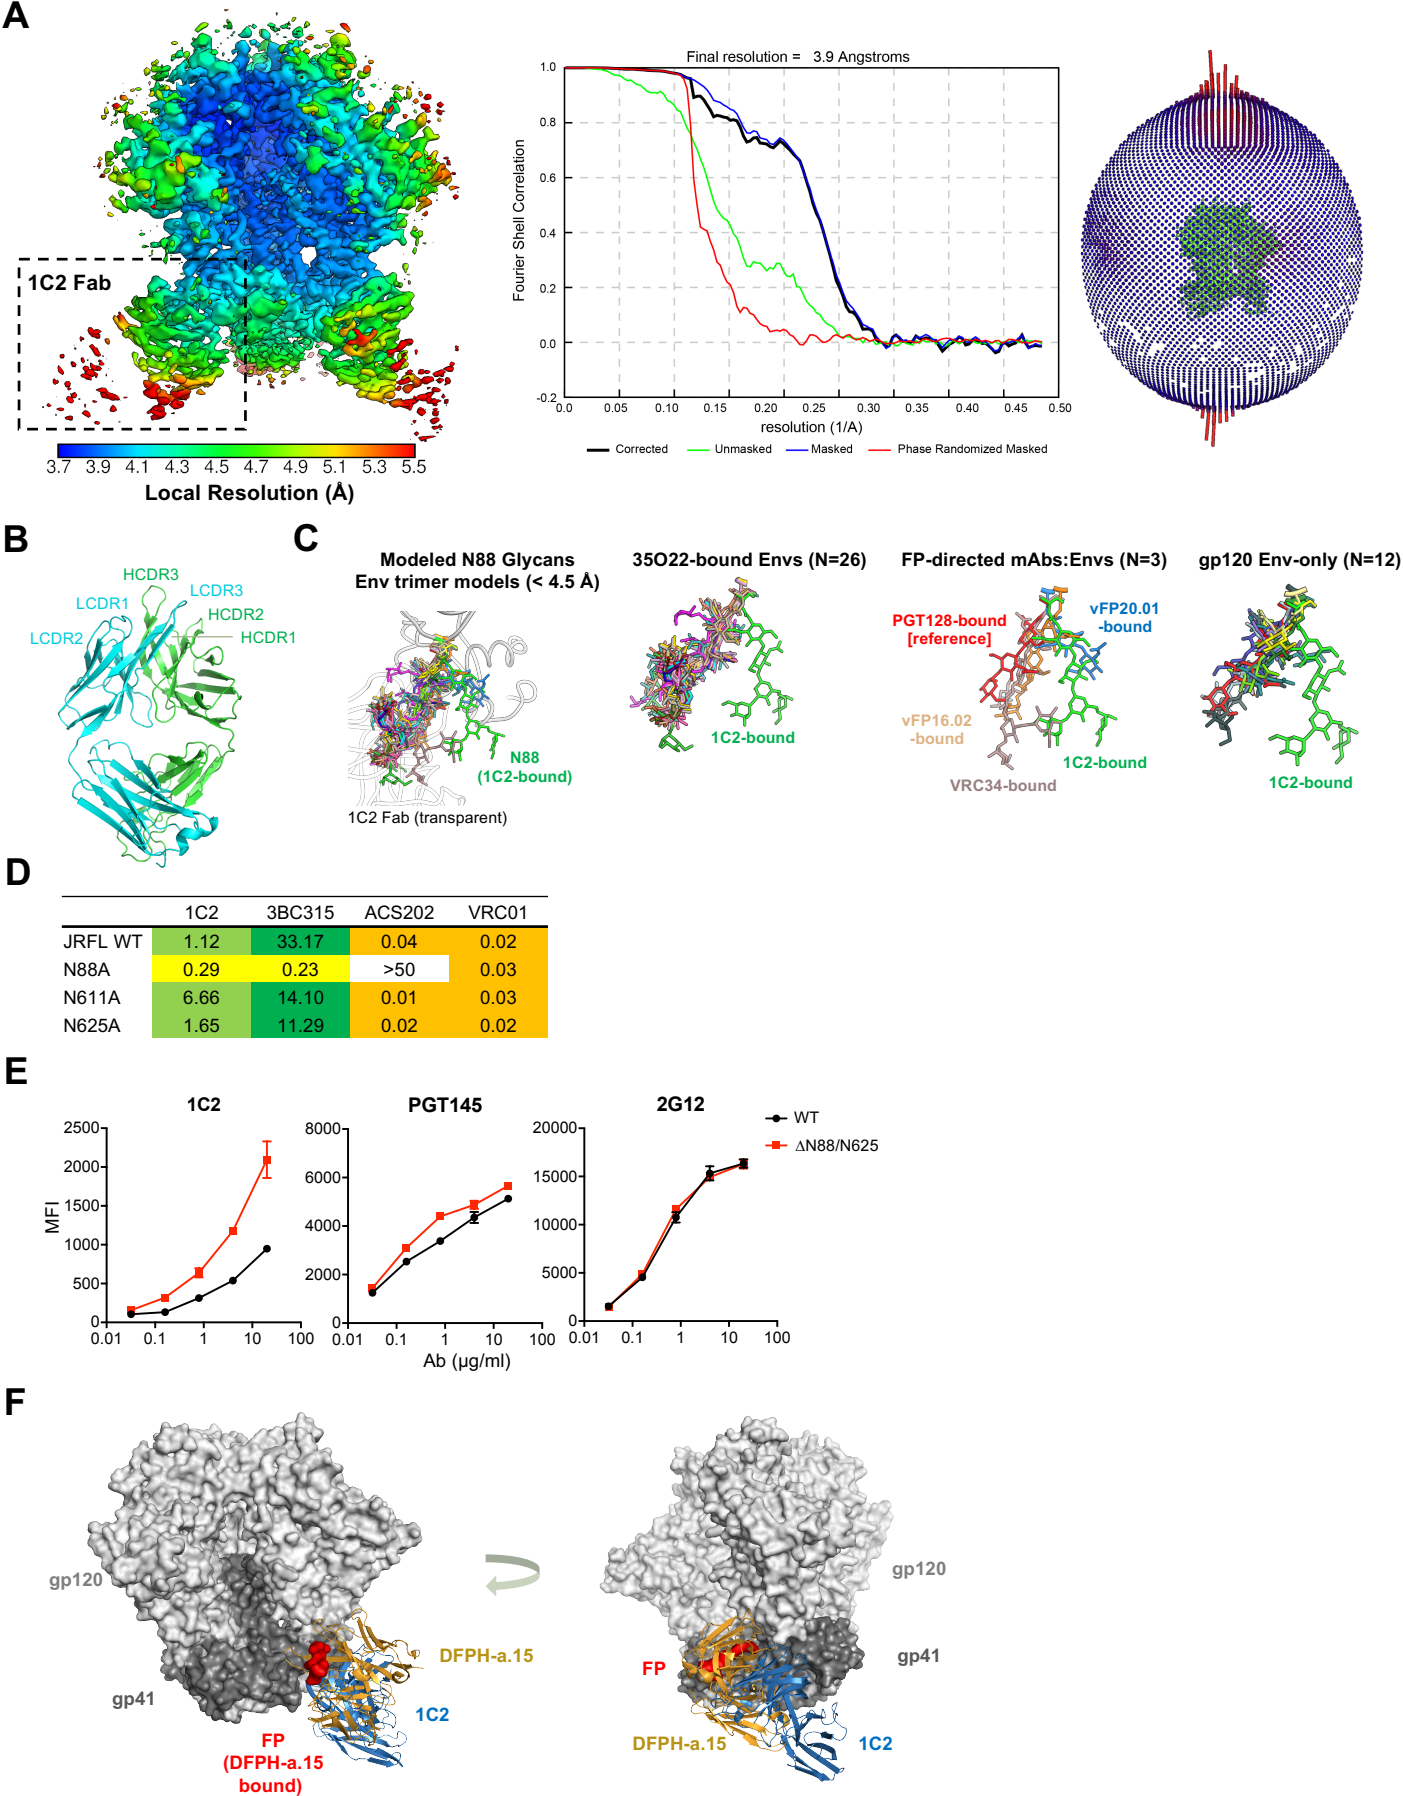

**Figure S6. Epitope analysis and high resolution cryoEM structure of 1C2 bound-Env trimer reveals complex interface recognition, related to Figure 6 and Tables S5-S6.** (A) ~3.9 Å resolution reconstruction of 16055 NFL TD 2CC+ trimer in complex with 1C2 Fab, colored by local resolution according to the key. One Fab is boxed for reference. To the right, the Fourier shell correlation (FSC) and orientation angle distribution of C3 symmetric reconstruction of 16055 NFL TD 2CC+ in complex with 1C2 Fab are shown. (B) Crystal structure of unliganded 1C2 Fab. Heavy (green) and light (cyan) chains are shown in ribbon representation. The CDRs are highlighted. (C) Comparison of the N88 glycan conformation between the 1C2-bound 16055 NFL TD 2CC+ structure (green) and other published HIV-1 trimer structures with near atomic resolution (< 4.5 Å) that have modeled N88 glycans (n = 42). Subset comparisons between 35O22-bound Env trimers, FP-directed mAbs (vFP20.01, PDB 6CDE; vFP16.02, PDB 6CDI; VRC34, PDB 5I8H ) with the N88 from the PGT128-bound Env (PDB 5ACO) shown as a reference, and gp120 Env-only structures are presented. (D) Neutralization sensitivity of gp120:gp41-directed mAbs against a panel of JRFL N-glycan mutants around the interface. VRC01 (CD4bs-directed) is included as a negative control. IC<sub>50</sub> (µg/ml) values are shown. (E) 1C2 binding to cell surface expressed WT BG505 Env compared to that with the N88 and N625 PNGS genetically removed (ΔN88/N625), as assessed by FACs. PGT145 and 2G12 binding were included as trimer expression controls. (F) Comparison of Env (gp120, light grey; gp41 dark grey) recognition by 1C2 (blue) and the vaccine-elicited FP targeting mAb DFPH-a.15 (orange; PDB 6N1W). Interaction with a single protomer is shown for clarity with the FP highlighted in red.

**Figure S7**

| Virus ID        | Clade | 1C2     | 3BC315  | Virus ID  | Clade | 1C2     | 3BC315  | Virus ID        | Clade | 1C2     | 3BC315  | Virus ID          | Clade | 1C2     | 3BC315  |
|-----------------|-------|---------|---------|-----------|-------|---------|---------|-----------------|-------|---------|---------|-------------------|-------|---------|---------|
| 0260.v5.c36     | A     | 7.8500  | >200    | CNE8      | AE    | 12.4000 | 6.7400  | QH0515.01       | B     | 61.1000 | 38.8000 | CAP244.D3         | C     | 0.5870  | >200    |
| 0330.v4.e3      | A     | 1.4200  | 3.9200  | M02138    | AE    | 0.4570  | 0.8490  | QH0692.42       | B     | 11.9000 | 32.1000 | CAP256.206.C9     | C     | >200    | >200    |
| 0439.v5.c1      | A     | 18.4000 | >200    | R1166.c1  | AE    | 7.3800  | 7.6700  | REJO.67         | B     | 6.8800  | 9.1800  | CAP45.G3          | C     | 25.1000 | 47.4000 |
| 3365.v2.c20     | A     | 17.6000 | >200    | R2184.c4  | AE    | 7.0600  | >200    | RHPA.7          | B     | 4.7500  | 2.3800  | Ce1176.A3         | C     | 5.9700  | #####   |
| 3415.v1.c1      | A     | 41.8000 | >200    | R3265.c6  | AE    | 9.1200  | >200    | SC422.8         | B     | 13.2000 | 19.5000 | CE703010217.B6    | C     | 9.7000  | >200    |
| 3718.v3.c11     | A     | 35.1000 | 24.8000 | TH023.6   | AE    | 0.0020  | 0.0120  | SF162.L5        | B     | 6.9400  | 11.3000 | CNE30             | C     | 10.7000 | #####   |
| 398-F1.F6.20    | A     | 7.7200  | 7.2100  | TH966.8   | AE    | 24.4000 | 4.7200  | S51196.01       | B     | 51.7000 | >200    | CNE31             | C     | 18.2000 | >200    |
| BB201.B42       | A     | 4.7400  | 6.8500  | TH976.17  | AE    | 6.1700  | >200    | THRO.18         | B     | 6.8400  | #####   | CNE53             | C     | 10.6000 | 2.1700  |
| BB539.2B13      | A     | 3.5100  | 1.3300  |           |       |         |         | TRJO.58         | B     | 5.1700  | 23.0000 | CNE58             | C     | 7.1800  | 82.3000 |
| BG505.W6M.C2    | A     | 8.9300  | 8.9200  | 242-14    | AG    | 6.1100  | >200    | TRO.11          | B     | 5.4700  | 3.4300  | DU123.06          | C     | 2.6600  | #####   |
| BI369.9A        | A     | 7.5700  | 12.6000 | 263-8     | AG    | 4.4500  | 0.4170  | WITO.33         | B     | 5.5600  | >200    | DU151.02          | C     | 3.4500  | 2.7500  |
| BS208.B1        | A     | 0.2370  | 0.3100  | 269-12    | AG    | 0.9310  | >200    | X2278.C2.B6     | B     | >200    | >200    | DU156.12          | C     | >200    | >200    |
| KER2008.12      | A     | 5.6900  | 2.5000  | 271-11    | AG    | 33.6000 | >200    | YU2.DG          | B     | 7.6300  | 5.2900  | DU172.17          | C     | >200    | >200    |
| KER2018.11      | A     | 16.8000 | 20.8000 | 928-28    | AG    | 12.4000 | >200    | BJOX002000.03.2 | BC    | 22.0000 | 32.9000 | DU422.01          | C     | 4.3800  | 6.8900  |
| KNH1209.18      | A     | 14.0000 | >200    | DJ263.8   | AG    | 1.8700  | #####   | CH038.12        | BC    | >200    | >200    | MW965.26          | C     | 0.1710  | >200    |
| MB201.A1        | A     | 3.3400  | 7.8500  | T250-4    | AG    | 11.3000 | >200    | CH070.1         | BC    | >200    | #####   | SO18.18           | C     | 20.8000 | >200    |
| MB539.2B7       | A     | 26.6000 | 3.5800  | T251-18   | AG    | 6.0300  | >200    | CH117.4         | BC    | 4.0200  | >200    | TV1.29            | C     | #####   | 39.7000 |
| M1369.A5        | A     | 14.2000 | 33.7000 | T253-11   | AG    | 40.8000 | >200    | CH119.10        | BC    | 2.5700  | >200    | TZA125.17         | C     | >200    | >200    |
| MS208.A1        | A     | 0.7190  | 0.8710  | T255-34   | AG    | 3.0100  | >200    | CH181.12        | BC    | 51.2000 | 61.1000 | TZBD.02           | C     | >200    | >200    |
| Q23.17          | A     | 10.7000 | 14.7000 | T257-31   | AG    | >200    | 35.4000 | CNE15           | BC    | 21.5000 | 9.1700  | ZA012.29          | C     | 6.2300  | >200    |
| Q259.17         | A     | 15.3000 | 5.7000  | T266-60   | AG    | >200    | >200    | CNE19           | BC    | 2.1000  | >200    | ZM106.9           | C     | 6.9800  | 5.8400  |
| Q769.d22        | A     | 2.2000  | 0.7100  | T278-50   | AG    | 2.5000  | >200    | CNE20           | BC    | 1.5200  | >200    | ZM109.4           | C     | 4.5800  | 1.1900  |
| Q769.h5         | A     | 15.0000 | 2.8000  | T280-5    | AG    | 18.4000 | 16.4000 | CNE21           | BC    | 6.1000  | >200    | ZM135.10a         | C     | 5.7100  | 94.0000 |
| Q842.d12        | A     | 10.8000 | 28.2000 | T33-7     | AG    | 19.6000 | >200    | CNE40           | BC    | 0.3900  | #####   | ZM176.66          | C     | 12.7000 | 43.6000 |
| QH209.14M.A2    | A     | 3.6700  | 3.6900  | 3988.25   | B     | 3.5700  | 4.8200  | CNE7            | BC    | 12.0000 | >200    | ZM197.7           | C     | 3.1400  | 3.1100  |
| RW020.2         | A     | 17.1000 | >200    | 5768.04   | B     | 34.5000 | 30.8000 | 286.36          | C     | 24.0000 | 5.3200  | ZM214.15          | C     | 10.5000 | 33.8000 |
| UG037.8         | A     | 25.8000 | 80.8000 | 6101.10   | B     | 0.6710  | 1.0300  | 288.38          | C     | 7.2500  | 1.8400  | ZM215.8           | C     | 2.8300  | 5.2700  |
| 246-F3.C10.2    | AC    | 2.4500  | 0.5400  | 6535.3    | B     | 9.7800  | >200    | 0013095-2.11    | C     | 8.9500  | 11.7000 | ZM233.6           | C     | 2.8500  | >200    |
| 3301.v1.c24     | AC    | 9.1000  | 80.1000 | 7165.18   | B     | 9.5500  | 10.4000 | 001428-2.42     | C     | 4.4200  | 2.5600  | ZM249.1           | C     | 7.7100  | 14.2000 |
| 3589.v1.c4      | AC    | 11.0000 | >200    | 45_01dG5  | B     | 11.9000 | 18.1000 | 0077.v1.c16     | C     | 14.5000 | #####   | ZM53.12           | C     | >200    | >200    |
| 6540.v4.c1      | AC    | 27.6000 | 15.9000 | 89.6.DG   | B     | 2.6700  | >200    | 00836-2.5       | C     | 13.4000 | 6.2800  | ZM55.28a          | C     | 28.9000 | 6.5700  |
| 6545.v4.c1      | AC    | 10.9000 | 10.0000 | AC10.29   | B     | 4.1600  | 7.1800  | 0921.v2.c14     | C     | 27.2000 | 21.5000 | 3326.v4.c3        | CD    | 38.0000 | >200    |
| 0815.v3.c3      | ACD   | 11.3000 | 6.9600  | ADA.DG    | B     | 28.8000 | >200    | 16055-2.3       | C     | 5.8500  | 42.9000 | 3337.v2.c6        | CD    | 7.2200  | >200    |
| 6095.v1.c10     | ACD   | 0.3170  | >200    | BaL.01    | B     | 14.2000 | 12.7000 | 16845-2.22      | C     | >200    | >200    | 3817.v2.c59       | CD    | 65.1000 | >200    |
| 3468.v1.c12     | AD    | 37.9000 | >200    | BaL.26    | B     | 19.0000 | 13.7000 | 16936-2.21      | C     | 4.6400  | >200    | 191821.E6.1       | D     | 27.8000 | 62.7000 |
| Q168.a2         | AD    | 14.5000 | 8.2300  | BG1168.01 | B     | 9.5500  | 11.3000 | 25710-2.43      | C     | 1.5900  | 0.7520  | 231965.c01        | D     | 57.0000 | >200    |
| Q461.e2         | AD    | >200    | >200    | BL01.DG   | B     | 20.1000 | 14.0000 | 25711-2.4       | C     | 12.8000 | >200    | 247-23            | D     | 51.5000 | 7.5600  |
| 620345.c1       | AE    | 31.5000 | >200    | BR07.DG   | B     | 5.7300  | 3.6200  | 25925-2.22      | C     | 4.9000  | 22.8000 | 3016.v5.c45       | D     | #####   | 7.0900  |
| BJOX009000.02.4 | AE    | 16.4000 | 14.3000 | BX08.16   | B     | 5.7900  | 2.8400  | 26191-2.48      | C     | 42.6000 | 94.5000 | 57128.vrc15       | D     | 8.2400  | >200    |
| BJOX10000.06.2  | AE    | 10.6000 | 37.2000 | CAAN.A2   | B     | 6.5400  | >200    | 3168.v4.c10     | C     | 4.9000  | >200    | 6405.v4.c34       | D     | 4.5400  | 6.4200  |
| BJOX025000.01.1 | AE    | 6.1600  | 78.3000 | CNE10     | B     | 7.0000  | 3.9200  | 3637.v5.c3      | C     | 62.9000 | 92.3000 | A03349M1.vrc4a    | D     | 6.0200  | >200    |
| BJOX028000.10.3 | AE    | 7.3500  | >200    | CNE12     | B     | 10.3000 | 9.6400  | 3873.v1.c24     | C     | >200    | 99.4000 | A07412M1.vrc12    | D     | 11.2000 | 74.1000 |
| C1080.c3        | AE    | 3.7700  | 28.2000 | CNE14     | B     | 30.6000 | #####   | 426c            | C     | 11.9000 | 7.8200  | NKU3006.ec1       | D     | 11.9000 | >200    |
| C2101.c1        | AE    | 5.8600  | >200    | CNE4      | B     | 5.8100  | >200    | 6322.v4.c1      | C     | 6.6300  | 4.9100  | UG021.16          | D     | 6.9400  | 2.8900  |
| C3347.c11       | AE    | >200    | >200    | CNE57     | B     | 7.8500  | 6.8200  | 6471.v1.c16     | C     | >200    | >200    | UG024.2           | D     | 5.2100  | 2.9900  |
| C4118.09        | AE    | 9.1400  | >200    | HO86.8    | B     | 4.0400  | 11.1000 | 6631.v3.c10     | C     | #####   | >200    | P0402.c2.11       | G     | 33.3000 | >200    |
| CM244.ec1       | AE    | 26.3000 | 15.5000 | HT593.1   | B     | 2.2100  | 0.9390  | 6644.v2.c33     | C     | 0.0630  | 0.0690  | P1981.C5.3        | G     | 0.8600  | >200    |
| CNE3            | AE    | 30.4000 | 63.8000 | HXB2.DG   | B     | 16.4000 | >200    | 6785.v5.c14     | C     | 29.5000 | >200    | X1193.c1          | G     | 39.1000 | >200    |
| CNE5            | AE    | 46.9000 | >200    | JRCSF.JB  | B     | 34.5000 | 50.5000 | 6838.v1.c35     | C     | 7.6700  | >200    | X1254.c3          | G     | #####   | >200    |
| CNE55           | AE    | 7.3400  | 4.1400  | JRFL.JB   | B     | 10.8000 | 19.0000 | 96ZM651.02      | C     | 1.7400  | 9.2000  | X1632.S2.B10      | G     | 32.3000 | >200    |
| CNE56           | AE    | 30.9000 | 3.5600  | MN.3      | B     | 0.2950  | 0.3860  | BR025.9         | C     | 4.3600  | 14.1000 | X2088.c9          | G     | 8.9300  | 57.8000 |
| CNE59           | AE    | 0.0840  | 0.0940  | PVO.04    | B     | 25.2000 | >200    | CAP210.E8       | C     | 8.2000  | 99.8000 | X2131.C1.B5       | G     | 5.8900  | >200    |
|                 |       |         |         |           |       |         |         |                 |       |         |         | SI/mMac251.30.SG3 | NA    | >200    | >200    |

|                        | 1C2  |       | 3BC315     |    |
|------------------------|------|-------|------------|----|
| # Viruses Neutralized  | #    | %     | #          | %  |
| IC50 <200ug/ml         | 192  | 92    | 127        | 61 |
| IC50 <50ug/ml          | 181  | 87    | 102        | 49 |
| IC50 <10ug/ml          | 105  | 50    | 63         | 30 |
| IC50 <1.0ug/ml         | 14   | 7     | 12         | 6  |
| IC50 <0.1ug/ml         | 3    | 1     | 3          | 1  |
| IC50 <0.01ug/ml        | 1    | 0     | 0          | 0  |
| <b>Total # Viruses</b> |      |       | <b>208</b> |    |
| <b>Median IC50</b>     | 8.93 | 10.00 |            |    |
| <b>Geometric Mean</b>  | 8.03 | 10.05 |            |    |

\*Median and Geometric Mean titers calculated only for samples with IC50 <50ug/ml

**Figure S7.** 1C2 neutralization breadth is broader than the human bNAb 3BC315, related to Figure 6. Neutralization IC<sub>50</sub> (μg/ml) values shown for 1C2 and 3BC315 against a diverse 208-virus panel.

**Table S1. Site-specific glycan analysis of N-glycan deleted trimers compared to WT, related to Figure 1.** Percentage point differences in glycan abundances for glycan-deleted constructs compared to WT. A decrease in glycan abundance greater than 10 percentage points is highlighted in increasing shades of red, whereas an increase in abundance is highlighted in green. Knocked-out glycans are highlighted in blue.

| <b>16055</b>  |      |       |      |       |       |       |       |       |       |       |       |       |       |       |       |      |       |       |
|---------------|------|-------|------|-------|-------|-------|-------|-------|-------|-------|-------|-------|-------|-------|-------|------|-------|-------|
| $\Delta$ Gly1 | 88   | 160   | 187D | 197   | 262   | 276   | 301   | 332   | 360   | 386   | 442   | 448   | 463   | 625   | 637   |      |       |       |
| M9            | -0.3 | 0.7   | -0.2 | -5.1  | -13.2 | K/O   | -6.1  | -9.6  | -13.4 | -15.4 | -14.4 | -11.4 | -0.2  | -0.4  | -15.1 |      |       |       |
| M8            | -0.6 | 5.7   | -0.7 | 1.2   | 4.0   |       | -2.6  | 6.9   | 4.5   | 11.7  | 5.1   | 1.1   | -0.3  | -0.4  | -0.3  |      |       |       |
| M7            | -0.7 | -3.9  | -0.7 | 0.4   | 2.5   |       | -6.7  | 2.2   | 1.2   | 6.5   | 4.1   | 1.9   | 0.0   | -0.5  | -3.2  |      |       |       |
| M6            | -3.1 | 3.6   | -0.4 | 0.2   | 3.1   |       | 3.5   | -0.1  | 1.1   | 1.3   | 1.7   | 0.9   | -0.1  | -0.4  | -0.9  |      |       |       |
| M5            | 3.4  | -5.3  | -6.1 | -1.7  | 3.7   |       | -0.1  | -0.2  | 4.0   | 0.2   | 2.6   | -0.6  | -0.3  | -0.4  | 0.2   |      |       |       |
| $\Delta$ Gly2 | 88   | 160   | 187D | 197   | 262   | 276   | 301   | 332   | 360   | 386   | 442   | 448   | 463   | 625   | 637   |      |       |       |
| M9            | 0.0  | -0.6  | -0.1 | -4.9  | -16.2 | K/O   | -2.9  | -15.3 | -40.1 | -17.4 | -20.1 | -17.2 | K/O   | -0.1  | -16.5 |      |       |       |
| M8            | 0.6  | 1.8   | 0.2  | 0.7   | 7.1   |       | -16.6 | 6.8   | 9.0   | 11.0  | 2.9   | -7.2  |       | 0.5   | -0.4  |      |       |       |
| M7            | -0.1 | -2.4  | 0.0  | 0.5   | 3.7   |       | 5.3   | 3.2   | 6.2   | 5.9   | 3.6   | 4.5   |       | 0.4   | -2.4  |      |       |       |
| M6            | -2.7 | 2.7   | 0.2  | 0.0   | 0.0   |       | 3.9   | 0.4   | 3.2   | 0.0   | 1.5   | 0.7   |       | 0.0   | -1.0  |      |       |       |
| M5            | 0.7  | -1.3  | -2.8 | 0.6   | 5.4   |       | 8.5   | 0.1   | 10.8  | 0.0   | 4.5   | 0.0   |       | -1.4  | 2.7   |      |       |       |
| $\Delta$ Gly4 | 88   | 160   | 187D | 197   | 262   | 276   | 301   | 332   | 360   | 386   | 442   | 448   | 463   | 625   | 637   |      |       |       |
| M9            | 0.2  | -13.0 | -0.2 | -6.8  | -8.0  | K/O   | K/O   | -29.9 | K/O   | -23.8 | -42.5 | -23.2 | K/O   | 0.5   | N.D.  |      |       |       |
| M8            | 0.8  | -1.5  | 1.3  | -2.0  | 1.5   |       |       | 9.7   |       | 9.3   | -19.0 | 0.7   |       | 1.1   | N.D.  |      |       |       |
| M7            | 1.3  | 1.7   | 1.0  | 1.2   | 1.7   |       |       | 5.3   |       | 6.0   | 9.9   | 8.0   |       | 1.5   | N.D.  |      |       |       |
| M6            | -0.5 | 4.7   | 0.3  | 0.3   | 1.5   |       |       | 1.0   |       | 0.0   | 25.9  | 2.7   |       | 0.5   | N.D.  |      |       |       |
| M5            | -5.5 | 7.4   | -6.8 | 2.1   | 3.2   |       |       | 0.3   |       | 0.0   | 16.7  | 1.1   |       | 4.3   | N.D.  |      |       |       |
| <b>JRFL</b>   |      |       |      |       |       |       |       |       |       |       |       |       |       |       |       |      |       |       |
| $\Delta$ Gly1 | 88   | 156   | 160  | 241   | 262   | 276   | 295   | 332   | 339   | 356   | 362   | 386   | 448   | 463   | 616   | 625  | 637   |       |
| M9            | 0.0  | 4.1   | -1.5 | -6.5  | -24.3 | K/O   | -9.0  | -11.8 | -3.4  | -0.1  | -38.7 | -5.7  | -18.2 | -0.4  | -0.1  | -0.1 | 0.8   |       |
| M8            | 0.1  | 2.6   | 1.2  | 0.3   | 15.3  |       | 9.0   | 1.0   | -13.6 | 0.0   | 27.3  | 7.3   | 4.2   | -0.7  | -0.1  | 0.1  | -10.4 |       |
| M7            | 0.7  | -2.7  | -0.2 | -2.9  | 2.4   |       | 0.0   | -0.2  | -8.9  | 0.3   | 6.5   | 0.0   | 2.0   | -0.4  | 0.0   | 0.4  | -17.8 |       |
| M6            | 1.5  | -1.8  | 0.3  | -0.9  | 0.0   |       | 0.0   | -0.1  | -0.7  | 0.1   | 1.6   | 0.0   | 1.0   | 0.2   | 0.0   | 0.6  | -8.7  |       |
| M5            | 4.0  | -1.7  | 1.0  | 2.9   | 6.5   |       | 0.0   | 3.8   | 1.7   | 0.8   | 2.1   | 0.0   | 1.5   | 3.1   | 1.6   | 4.7  | -0.4  |       |
| $\Delta$ Gly2 | 88   | 156   | 160  | 241   | 262   | 276   | 295   | 332   | 339   | 356   | 362   | 386   | 448   | 463   | 616   | 625  | 637   |       |
| M9            | 0.0  | 4.2   | -4.8 | -4.7  | -28.0 | K/O   | -4.0  | -15.3 | -3.7  | -0.1  | -42.3 | -7.0  | -27.4 | K/O   | -0.1  | -0.1 | 0.0   |       |
| M8            | 0.0  | 1.1   | -3.7 | -4.6  | 21.1  |       | 4.0   | -6.0  | -17.1 | 0.0   | 12.8  | 5.3   | -1.2  |       | 0.1   | 0.3  | -11.6 |       |
| M7            | 0.3  | -2.8  | 0.4  | -8.9  | 2.9   |       | 0.0   | 0.3   | -12.7 | 0.3   | 10.5  | 0.0   | 3.7   |       | 0.3   | 0.7  | -20.1 |       |
| M6            | -1.0 | -1.6  | 0.5  | -2.2  | 0.8   |       | 0.0   | -0.4  | -4.3  | 0.2   | 8.1   | 0.0   | 1.6   |       | 0.2   | 0.7  | -9.9  |       |
| M5            | 2.8  | -0.3  | 3.1  | 5.7   | 1.2   |       | 0.0   | 5.6   | -1.0  | 1.4   | 5.3   | 0.0   | 2.1   |       | 3.0   | 2.8  | 1.5   |       |
| <b>BG505</b>  |      |       |      |       |       |       |       |       |       |       |       |       |       |       |       |      |       |       |
| $\Delta$ Gly1 | 88   | 160   | 190  | 197   | 234   | 262   | 276   | 295   | 332   | 339   | 355   | 363   | 386   | 448   | 462   | 611  | 618   | 637   |
| M9            | 0.0  | -29.0 | -0.1 | -14.9 | -55.5 | -36.9 | K/O   | -21.4 | -33.8 | -23.7 | -0.2  | -28.1 | -24.7 | -38.4 | 0.0   | 0.0  | 0.0   | -1.1  |
| M8            | -0.4 | 14.7  | -0.7 | 2.7   | 27.0  | 17.9  |       | 14.8  | 11.7  | 7.0   | -0.4  | 13.9  | 17.7  | 6.2   | -0.3  | -1.5 | 0.0   | -15.7 |
| M7            | -0.3 | 7.4   | -0.3 | 4.1   | 12.9  | 5.2   |       | 4.1   | 10.7  | 4.0   | -0.9  | 6.3   | 4.8   | 10.3  | -0.3  | 0.0  | 0.0   | -32.1 |
| M6            | -1.1 | 4.3   | -0.1 | 6.1   | 10.4  | 13.3  |       | 2.5   | 2.2   | 1.2   | -0.6  | 4.4   | 0.0   | 7.2   | -0.1  | 0.3  | 0.0   | -14.4 |
| M5            | -1.7 | 2.6   | -1.2 | -0.7  | 5.0   | 0.5   |       | 0.0   | -0.1  | 0.3   | -14.1 | 2.5   | 0.0   | 4.8   | -0.1  | 3.4  | 1.0   | 20.1  |
| $\Delta$ Gly2 | 88   | 160   | 190  | 197   | 234   | 262   | 276   | 295   | 332   | 339   | 355   | 363   | 386   | 448   | 462   | 611  | 618   | 637   |
| M9            | 0.0  | -35.4 | -0.1 | -21.0 | -69.1 | -44.0 | K/O   | -36.1 | -38.7 | -32.5 | -0.2  | -37.1 | -52.6 | -45.3 | K/O   | 0.0  | 0.0   | -1.1  |
| M8            | -0.2 | 15.9  | -0.3 | -3.0  | 35.0  | 20.9  |       | 13.6  | 6.8   | 4.7   | -0.3  | 19.5  | 41.7  | -1.9  |       | -0.4 | 0.0   | -15.7 |
| M7            | -0.2 | 7.9   | -0.6 | 3.0   | 16.7  | 8.6   |       | 5.0   | 6.0   | 4.8   | -1.0  | 3.2   | 9.7   | 7.9   |       | 0.7  | 0.0   | -29.5 |
| M6            | -0.7 | 4.8   | 0.1  | 5.3   | 12.1  | 13.4  |       | 3.1   | 1.9   | 1.8   | -0.8  | 7.9   | 0.0   | 8.6   |       | 1.8  | 0.0   | -14.4 |
| M5            | -2.3 | 4.7   | -0.6 | 2.2   | 2.6   | 1.1   |       | 0.0   | -0.1  | 0.4   | -19.8 | 4.0   | 0.0   | 8.8   |       | 12.5 | -0.1  | 14.9  |

**Table S2. mAbs cloned from rabbit C3, related to Figures 3, 5, S3, and Table S3 and S4.**

Env binding (+), # of mAbs with positive binding to Env by ELISA. Neutralizing, # of mAbs capable of neutralizing  $\geq 1$  HIV-1 strains.

| Set#         | Probes                                        | #Cells Sorted | #mAbs Cloned | Productive | Env Binding (+) | Neutralizing |
|--------------|-----------------------------------------------|---------------|--------------|------------|-----------------|--------------|
| 1            | 16066 gp120+<br>16055 gp120<br>368R/474A-     | 176           | 15           | 13         | 13              | 5            |
| 2            | 16055 gp120+<br>16055 gp120 368R-             | 88            | 12           | 2          | 2               | 0            |
| 3            | 16066 gp120+<br>SC422 NFL TD CC+              | 88            | 2            | 1          | 1               | 1            |
| 4            | 16055 NFL TD CC+<br>JRFL NFL TD14             | 121           | 3            | 2          | 2               | 2            |
| 5            | 16055 NFL TD CC+<br>16055 gp120 $\Delta$ Gly4 | 14            | 10           | 1          | 0               | 0            |
| 6            | 16055 NFL TD CC+                              | 118           | 10           | 7          | 4               | 4            |
| 7            | 16055 gp120<br>16055 gp120 $\Delta$ Gly4      | 70            | 11           | 4          | 2               | 1            |
| 8            | 16055 NFL TD CC+<br>1086 NFL TD CC+           | 116           | 36           | 20         | 19              | 8            |
| <b>Total</b> |                                               | <b>791</b>    | <b>99</b>    | <b>50</b>  | <b>43</b>       | <b>21</b>    |

**Table S3. Rabbit single-cell PCR primers, related to Figures 3, 5, S3 and Tables S2 and S4. Supplemental primers to those reported in McCoy et al., 2016.**

| <b>PCR step</b> | <b>Primer Name</b> | <b>5'-3' sequence</b>            |
|-----------------|--------------------|----------------------------------|
| Kappa PCR 1     | KFOut1             | GRACAYGAGGGCCCCCACTCAG           |
| Kappa PCR 1     | KFOut2             | CYAGSCAGGACCCAGCATG              |
| Kappa PCR 1     | KROut1             | CATCCACCTCCAGGTGACGG             |
| Kappa PCR 1     | KROut2             | CATCCACCTTCCAGGTGACGGT           |
| Kappa PCR 1     | KROut3             | CATCCACCTGCCAGGTGACGG            |
| Kappa PCR 2     | KFIn1              | GMTGGGGCTCCTRCTGC                |
| Kappa PCR 2     | KRIn2              | CACACGATGGTGACTGTTTCAGTTG        |
| Kappa PCR 2     | KRIn3              | CACACGATGGTGGCTGTTCC             |
| Heavy PCR 1     | HForOut            | GGCTTCTCCTGGTCGCTGTGCTCAAAGGTGTC |
| Heavy PCR 1     | HROut1             | GATCATGCAGGTCAGGCTGACCGACCTGC    |
| Heavy PCR 1     | HROut2             | GGCTTCTGCAGAGCTCCCGACTCCTGTC     |
| Heavy PCR 1     | RH1OutR            | GACACACCCAGCTCCACGGTGAC          |
| Heavy PCR 2     | RH1inR             | GCCAGTGGGAAGACTGAYGGAG           |
| Heavy PCR 2     | HVForIn            | GCTGTGCTCAAAGGTGTCCAGTGTC        |
| Heavy PCR 2     | HVRevIn            | CAGTGGGAAGACTGAYGGAGCCTTAG       |

**Table S4. Profile of neutralizing mAbs cloned from rabbit C3, related to Figures 3, 5, S3, and Tables S2-S3.** Tissue refers to the tissue sample from which the B cell were sorted; LN, lymph nodes, PBMCs, peripheral blood mononuclear cells. (+) indicates positive binding to Env by ELISA. Neutralization IC<sub>50</sub> (µg/ml) values are indicated and colored by potency.

| #  | mAb  | Tissue | Probes                                 | Env Binding | Tier 1 Viruses |       | Tier 2 Viruses |        |        |
|----|------|--------|----------------------------------------|-------------|----------------|-------|----------------|--------|--------|
|    |      |        |                                        |             | MN.3           | HXBc2 | 16055          | Ce1176 | TRO.11 |
| 1  | A44  | Spleen | 16055 gp120+<br>16055 gp120 368R/474A- | +           | >50            | >50   | 19.11          | >50    | >50    |
| 2  | A147 |        |                                        | +           | 0.001          | >50   | >50            | >50    | >50    |
| 3  | A163 |        |                                        | +           | 0.05           | >50   | >50            | >50    | >50    |
| 4  | A170 |        |                                        | +           | 0.01           | >50   | >50            | >50    | >50    |
| 5  | A174 |        |                                        | +           | >50            | 0.41  | >50            | >50    | >50    |
| 6  | E70  | Spleen | 16055 gp120/SC422 NFL TD CC+           | +           | >50            | >50   | 0.454          | 0.15   | 3.551  |
| 7  | F5   | Spleen | 16055 NFL TD CC+<br>JRFL NFL TD14      | +           | >50            | >50   | 5.57           | >50    | >50    |
| 8  | G70  | Spleen |                                        | +           | 0.018          | 0.08  | >50            | >50    | >50    |
| 9  | 2D5  | LN     |                                        | +           | 0.48           | >50   | 26.82          | >50    | >50    |
| 10 | B5   | LN     | 16055 NFL TD CC+                       | +           | 1.88           | >50   | >50            | >50    | >50    |
| 11 | D4   |        |                                        | +           | 0.13           | >50   | >50            | >50    | >50    |
| 12 | F4   |        |                                        | +           | 0.09           | >50   | >50            | >50    | >50    |
| 13 | H2   |        |                                        | +           | 0.5            | >50   | >50            | >50    | >50    |
| 14 | 1C2  | LN     | 16055 NFL TD CC+                       | +           | 0.3            | 17.04 | 4.56           | 4.46   | 21.38  |
| 15 | 1D1  |        |                                        | +           | 1.8            | >50   | >50            | >50    | >50    |
| 16 | 1D6  |        |                                        | +           | 13.02          | 6.31  | >50            | >50    | >50    |
| 17 | 1G9  |        |                                        | +           | 0.61           | 0.22  | >50            | >50    | >50    |
| 18 | 1F4  |        |                                        | +           | 6.09           | >50   | >50            | >50    | >50    |
| 19 | 2A6  |        |                                        | +           | 0.18           | >50   | >50            | >50    | >50    |
| 20 | 2C5  | PBMCs  | 1086 NFL TD CC+                        | +           | 0.02           | >50   | 21.38          | >50    | >50    |
| 21 | A10  |        |                                        | +           | 1.23           | 0.76  | >50            | >50    | >50    |



**Table S5. CryoEM data collection and processing statistics, related to Figures 4, 6, S4, and S6.**

| <b>Map</b>                                     | <b>E70 Fab:BG505 NFL CC+</b> | <b>1C2 Fab:16055 NFL TD 2CC+</b> |
|------------------------------------------------|------------------------------|----------------------------------|
| <b>Data collection</b>                         |                              |                                  |
| Microscope                                     | FEI Titan Krios              | FEI Talos Arctica                |
| Voltage (kV)                                   | 300                          | 200                              |
| Detector                                       | Gatan K2 Summit              | Gatan K2 Summit                  |
| Recording mode                                 | Counting                     | Counting                         |
| Nominal magnification                          | 29,000                       | 36,000                           |
| Movie micrograph pixelsize (Å)                 | 1.03                         | 1.15                             |
| Dose rate (e <sup>-</sup> /[(camera pixel)*s]) | 5.04                         | 5.10                             |
| Number of frames per movie micrograph          | 48                           | 50                               |
| Frame exposure time (ms)                       | 250                          | 250                              |
| Movie micrograph exposure time (s)             | 12.0                         | 12.5                             |
| Total dose (e <sup>-</sup> /Å <sup>2</sup> )   | 57                           | 48                               |
| Defocus range (µm)                             | -0.5 to -2.0                 | -0.7 to -2.5                     |
| <b>EM data processing</b>                      |                              |                                  |
| Number of movie micrographs                    | 870                          | 1,690                            |
| Number of molecular projection images in map   | 49,635                       | 23,702                           |
| Symmetry                                       | C3                           | C3                               |
| Map resolution (FSC 0.143; Å)                  | 3.57                         | 3.94                             |
| Local resolution range (Å) <sup>1</sup>        | 3.4-5.2                      | 3.7-5.5                          |
| Map sharpening B-factor (Å <sup>2</sup> )      | -138                         | -111                             |
| <b>Structure Building and Validation</b>       |                              |                                  |
| Number of atoms in deposited model             |                              |                                  |
| NFL Env                                        | 13,029                       | 13,209                           |
| Fab Fv                                         | 5,061                        | 5,295                            |
| glycans                                        | 1,113                        | 1,815                            |
| MolProbity score                               | 1.13                         | 0.95                             |
| Clashscore                                     | 1.09                         | 1.75                             |
| Map correlation coefficient                    | 0.82                         | 0.81                             |
| EMRinger score                                 | 3.69                         | 2.77                             |
| RMSD from ideal                                |                              |                                  |
| Bond length (Å)                                | 0.02                         | 0.02                             |
| Bond angles (°)                                | 1.83                         | 1.84                             |
| Ramachandran plot                              |                              |                                  |
| Favored (%)                                    | 95.41                        | 97.94                            |
| Allowed (%)                                    | 4.59                         | 2.06                             |
| Outliers (%)                                   | 0.00                         | 0.00                             |
| Side chain rotamer outliers (%)                | 0.15                         | 0.44                             |

<sup>1</sup>In modeled regions of map; based on Relion 3.0 Local Resolution function

**Table S6. Crystallization data collection and refinement statistics for 1C2 Fab, related to Figures 6 and S6.**

| 1C2 unliganded                                       |                                 |
|------------------------------------------------------|---------------------------------|
| <b>Data collection</b>                               |                                 |
| Space group                                          | P2 <sub>2</sub> ,2 <sub>1</sub> |
| Cell dimensions                                      |                                 |
| <i>a</i> , <i>b</i> , <i>c</i> (Å)                   | 71.80, 98.60, 162.98            |
| $\alpha$ , $\beta$ , $\gamma$ (°)                    | 90, 90, 90                      |
| Resolution (Å)                                       | 50-2.30 (2.34-2.30)*            |
| <i>R</i> <sub>sym</sub> or <i>R</i> <sub>merge</sub> | 0.071 (0.723) *                 |
| <i>I</i> / <i>σ</i>                                  | 12.4 (1.4)*                     |
| Completeness (%)                                     | 88.0 (80.4)*                    |
| Redundancy                                           | 3.7 (2.8)*                      |
| <i>CC</i> <sub>1/2</sub>                             | 0.998 (0.686)*                  |
| <b>Refinement</b>                                    |                                 |
| Resolution (Å)                                       | 35.44-2.296 (2.378-2.296)*      |
| No. reflections                                      | 42,972                          |
| <i>R</i> <sub>work</sub> / <i>R</i> <sub>free</sub>  | 21.92/25.42 (29.74/33.57)*      |
| No. atoms                                            | 6753                            |
| Protein                                              | 6475                            |
| Water                                                | 268                             |
| Ligand                                               | 10                              |
| B-factors (Å <sup>2</sup> )                          | 41.64                           |
| Protein                                              | 41.71                           |
| Water                                                | 38.54                           |
| Ligand                                               | 78.05                           |
| R.m.s deviations                                     |                                 |
| Bond lengths (Å)                                     | 0.004                           |
| Bond angles (°)                                      | 0.72                            |
| Ramachadran Favored %                                | 95.35                           |
| Ramachadran Outliers %                               | 0.23                            |
| MolProbity all-atoms clashscore                      | 1.96                            |
